# Supplementary material for: New Insight into the Impact of Effervescence on Gel Layer Microstructure and Drug Release of Effervescent Matrices Using Combined Mechanical and Imaging Characterisation Techniques
Source: MDPI journal article supplement (doi:10.3390/pharmaceutics14112299), 2022-10-26
Supplement: s1 [file s1]

**Supplement data for research article:** New Insight into the Impact of Effervescence on Gel Layer Microstructure and Drug Release of Effervescent Matrices Using Combined Mechanical and Imaging Characterisation Techniques.

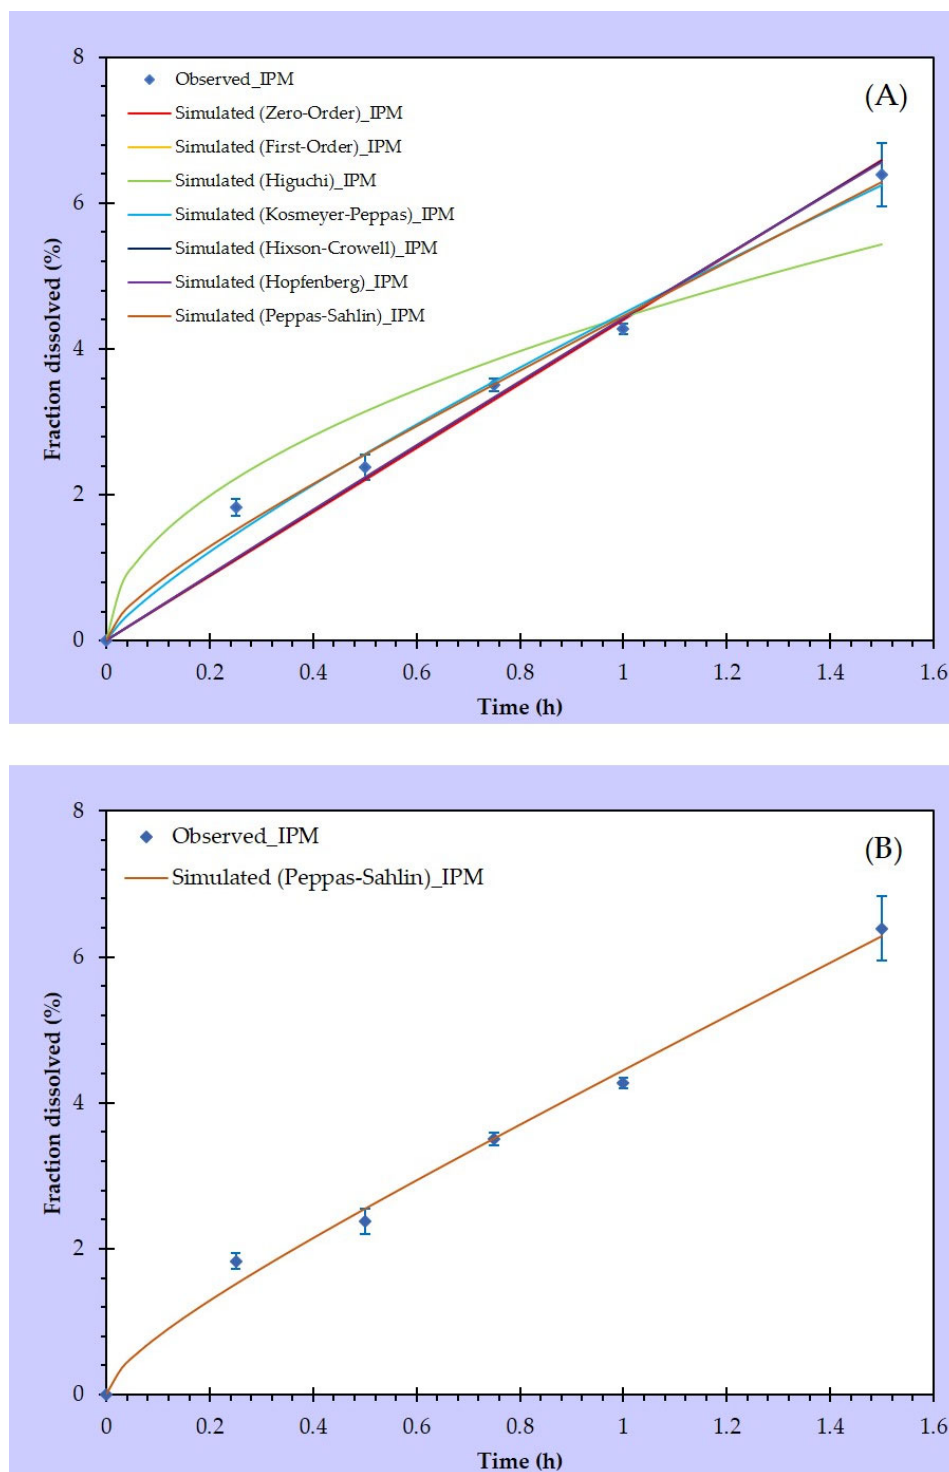

**Figure S1.** Mathematic model fitting of drug release profiles of IPM in 0.1 N HCl buffer: (A) All mathematic models fitting, (B) Best mathematic model fitting

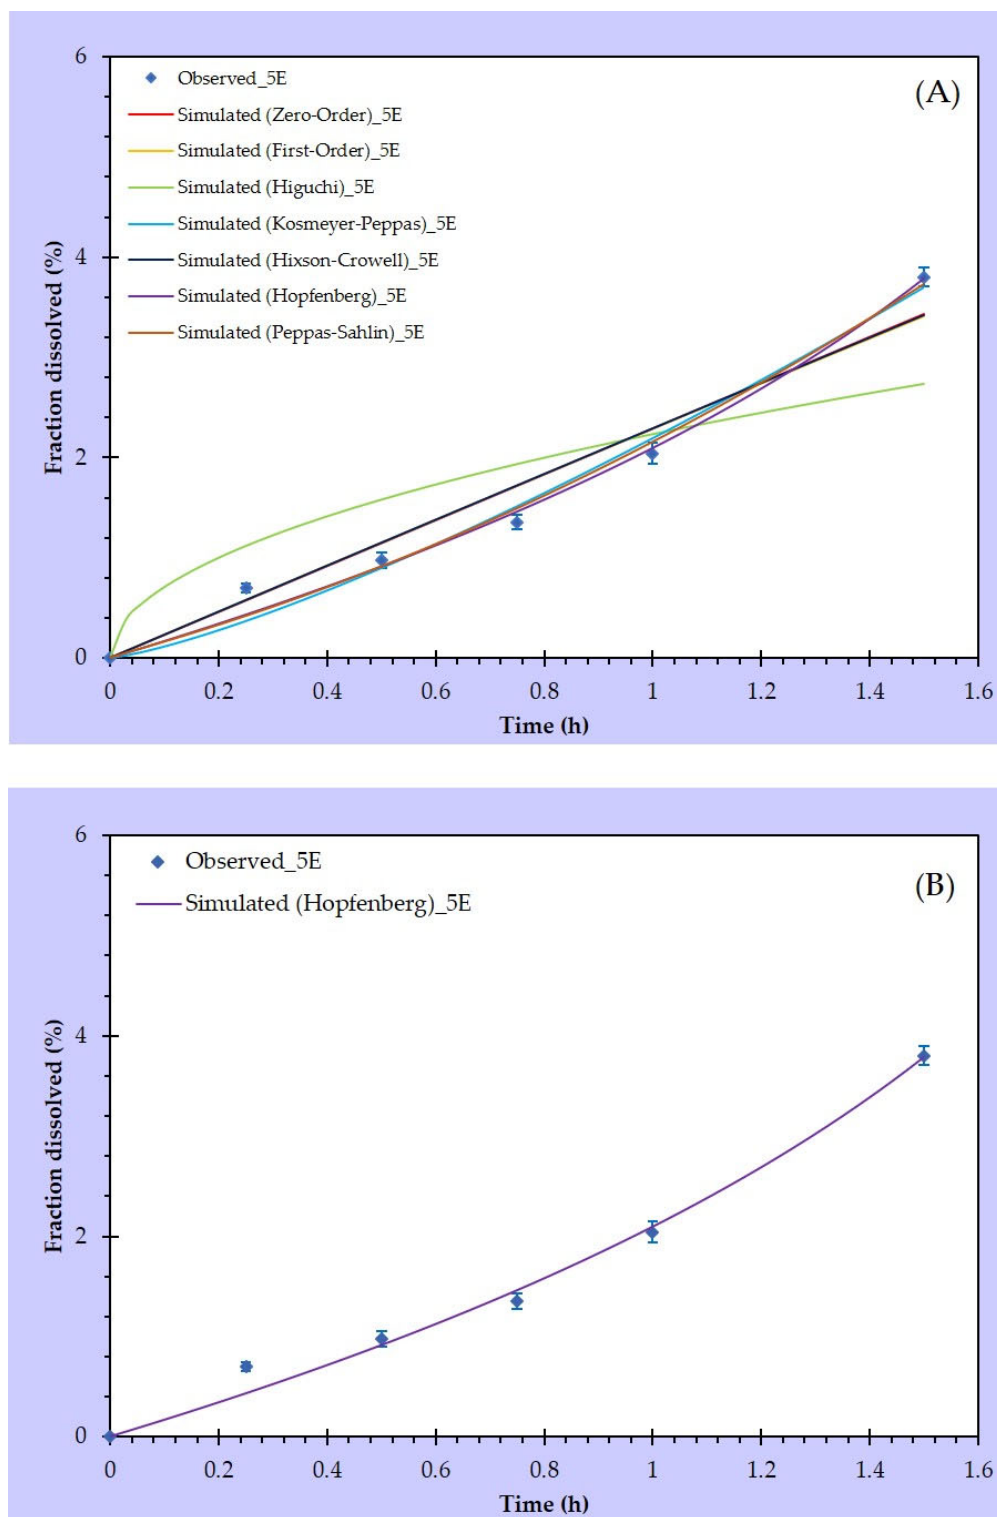

**Figure S2.** Mathematic model fitting of drug release profiles of 5E in 0.1 N HCl buffer: (A) All mathematic models fitting, (B) Best mathematic model fitting

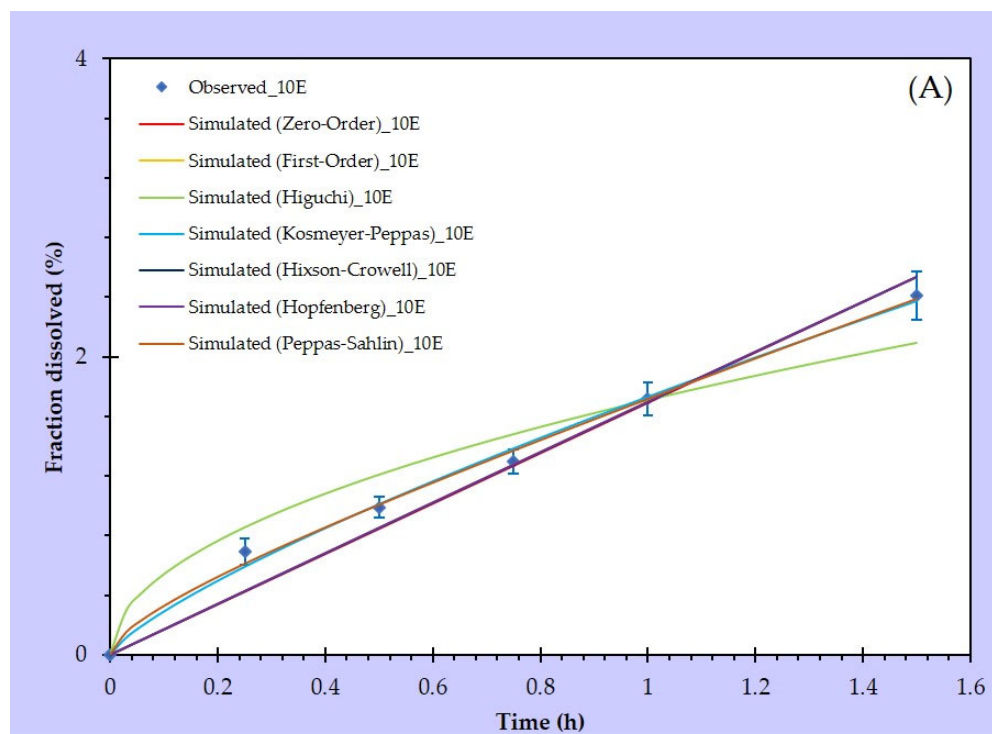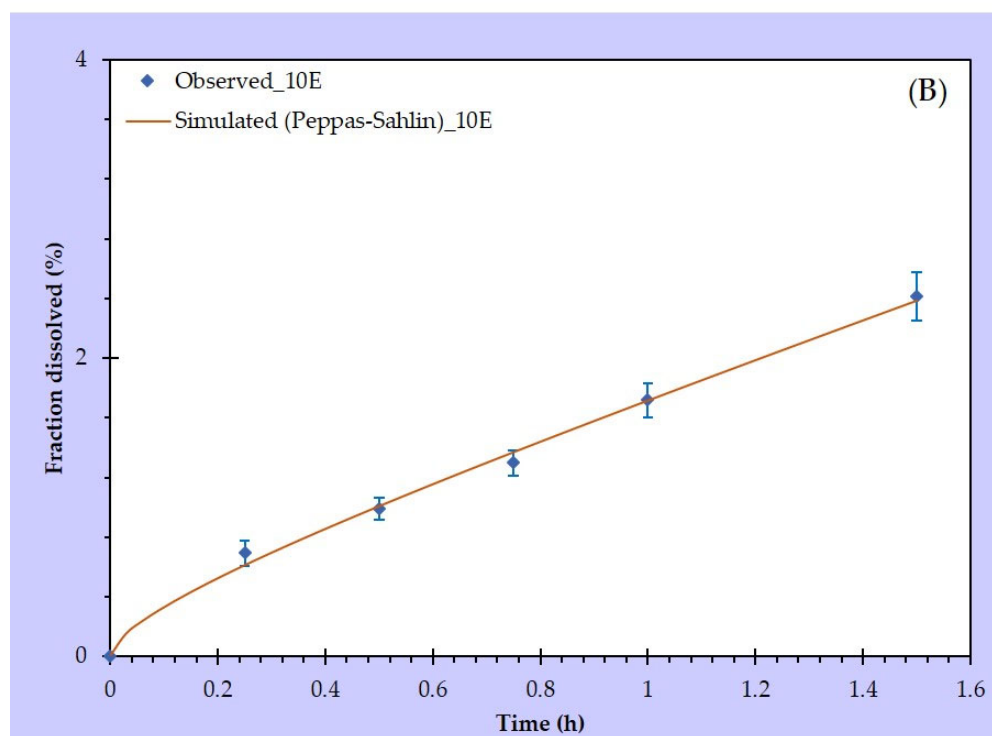

**Figure S3.** Mathematic model fitting of drug release profiles of 10E in 0.1 N HCl buffer: (A) All mathematic models fitting, (B) Best mathematic model fitting

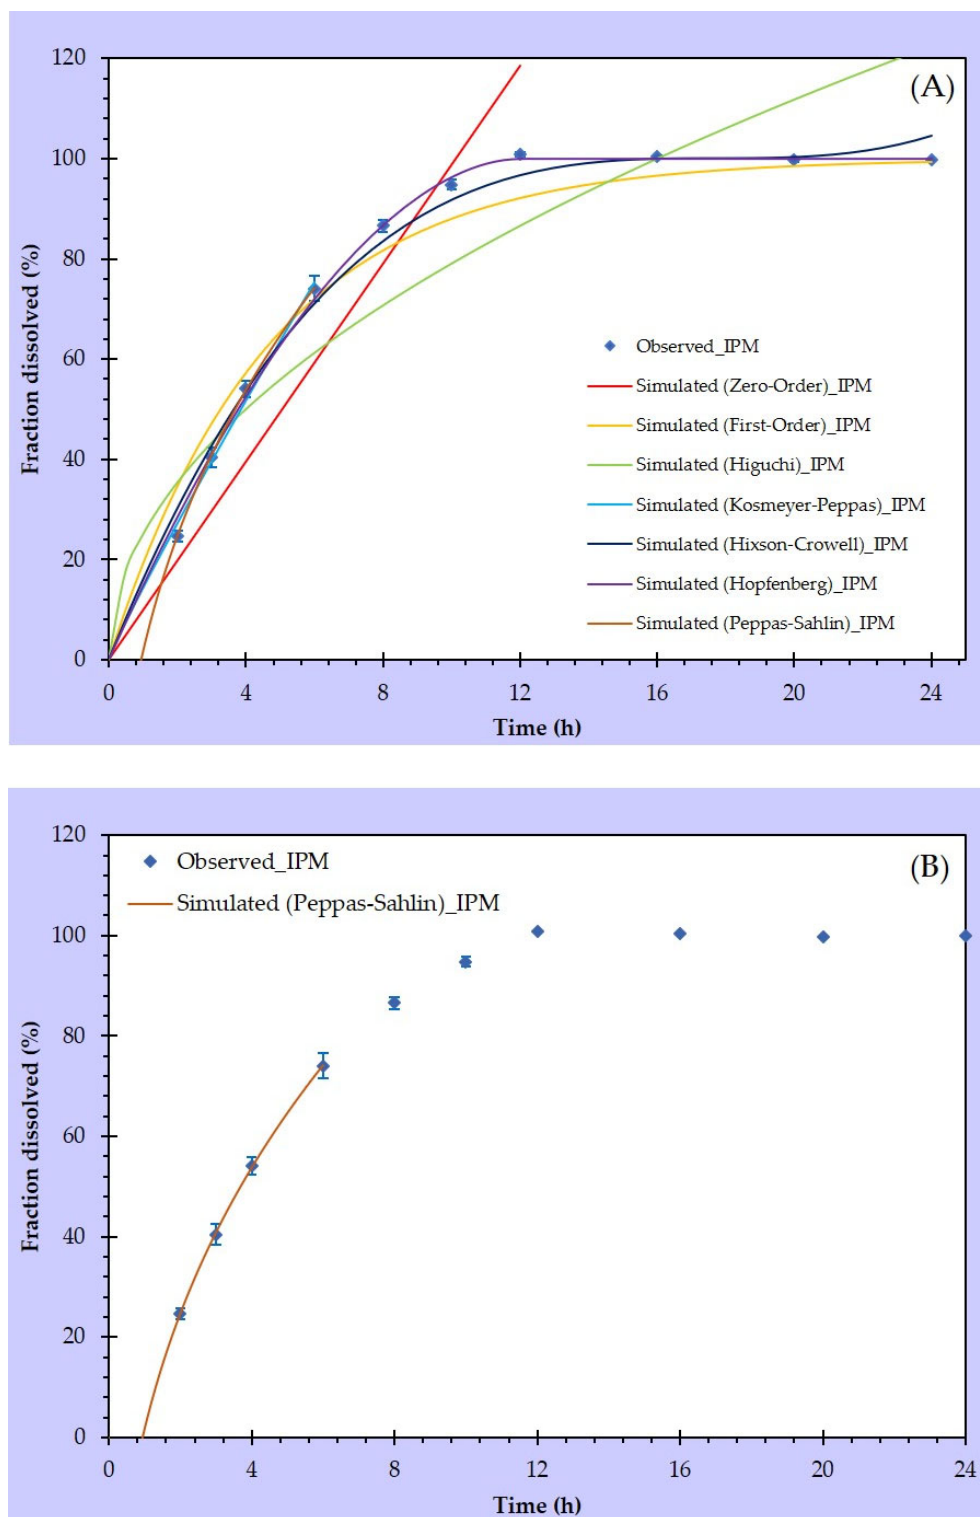

**Figure S4.** Mathematic model fitting of drug release profiles of IPM in phosphate buffer pH 6.8: (A) All mathematic models fitting, (B) Best mathematic model fitting

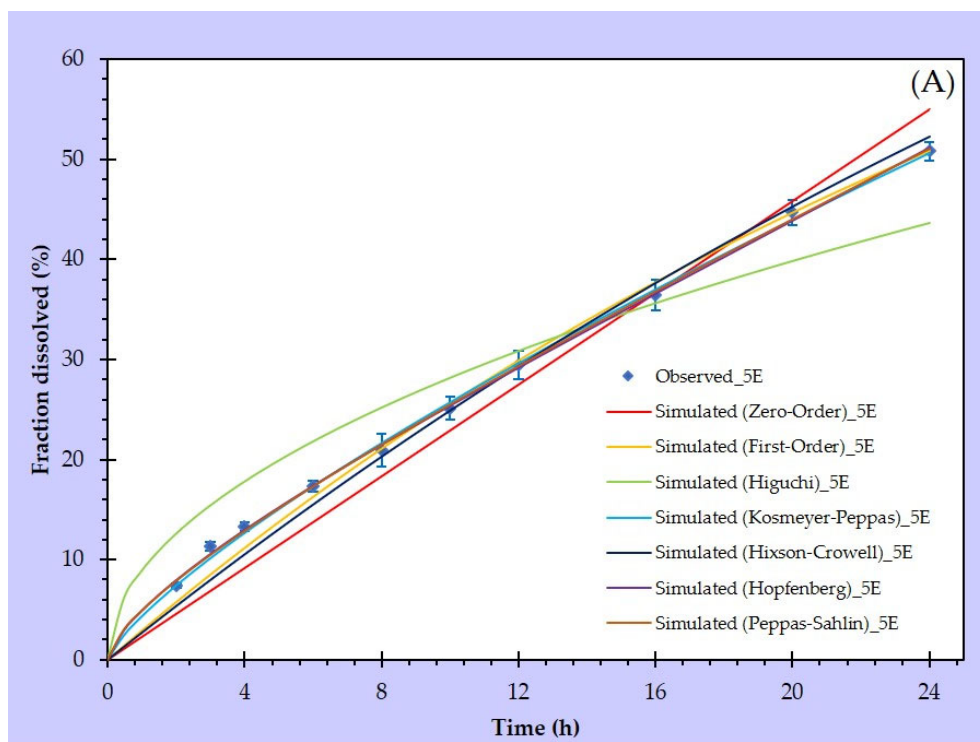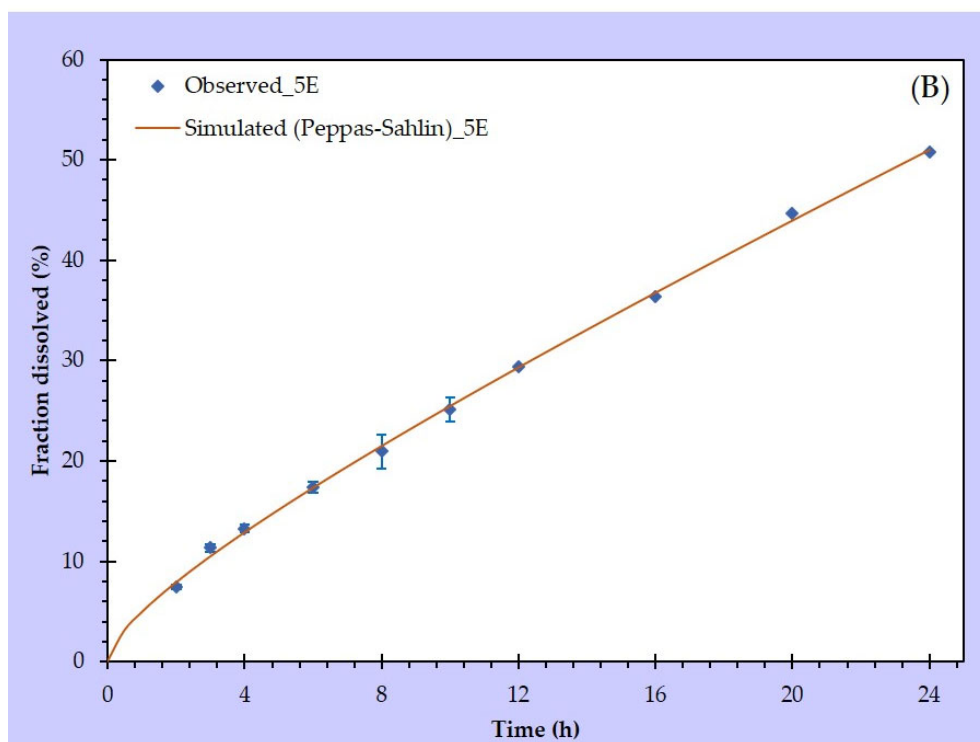

**Figure S5.** Mathematic model fitting of drug release profiles of 5E in phosphate buffer pH 6.8: (A) All mathematic models fitting, (B) Best mathematic model fitting

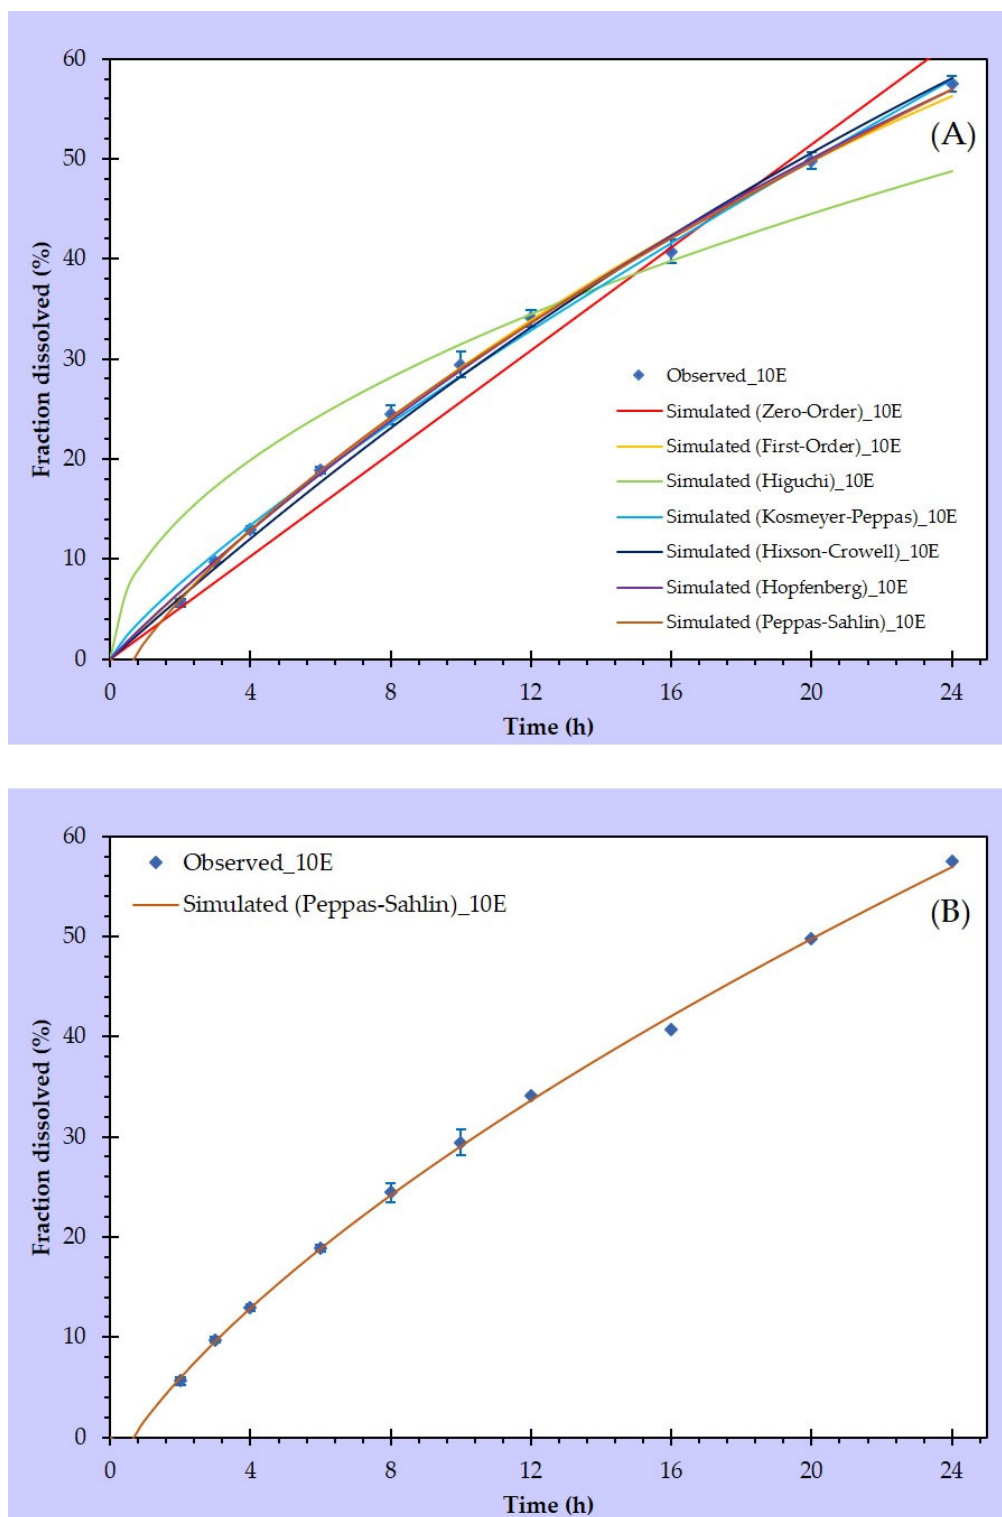

**Figure S6.** Mathematic model fitting of drug release profiles of 10E in phosphate buffer pH 6.8: (A) All mathematic models fitting, (B) Best mathematic model fitting

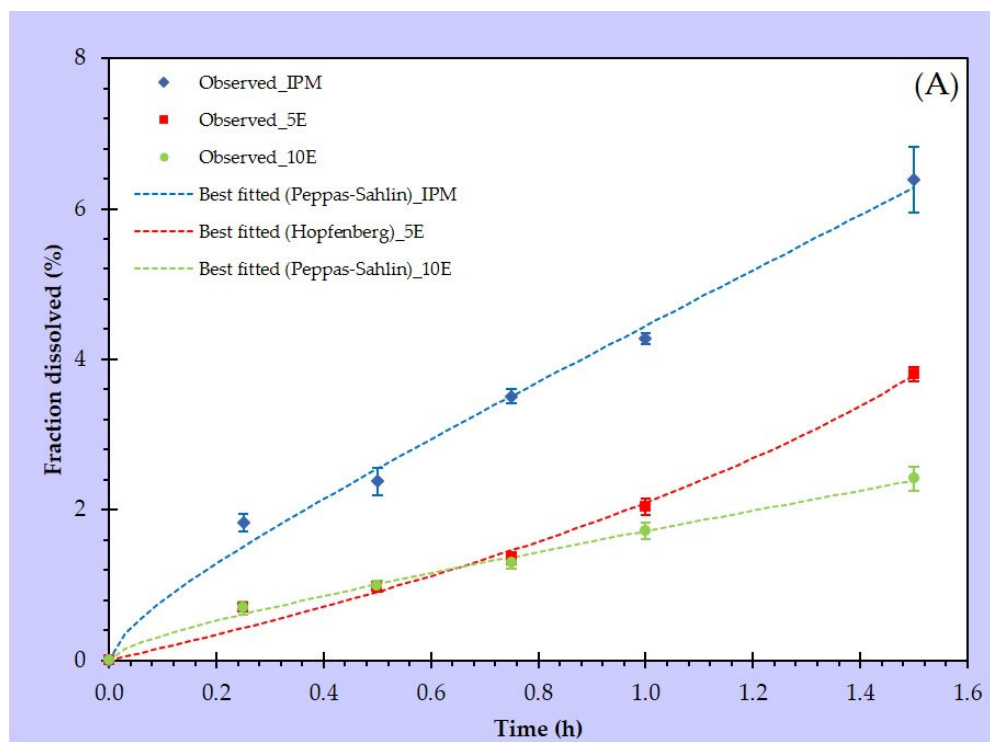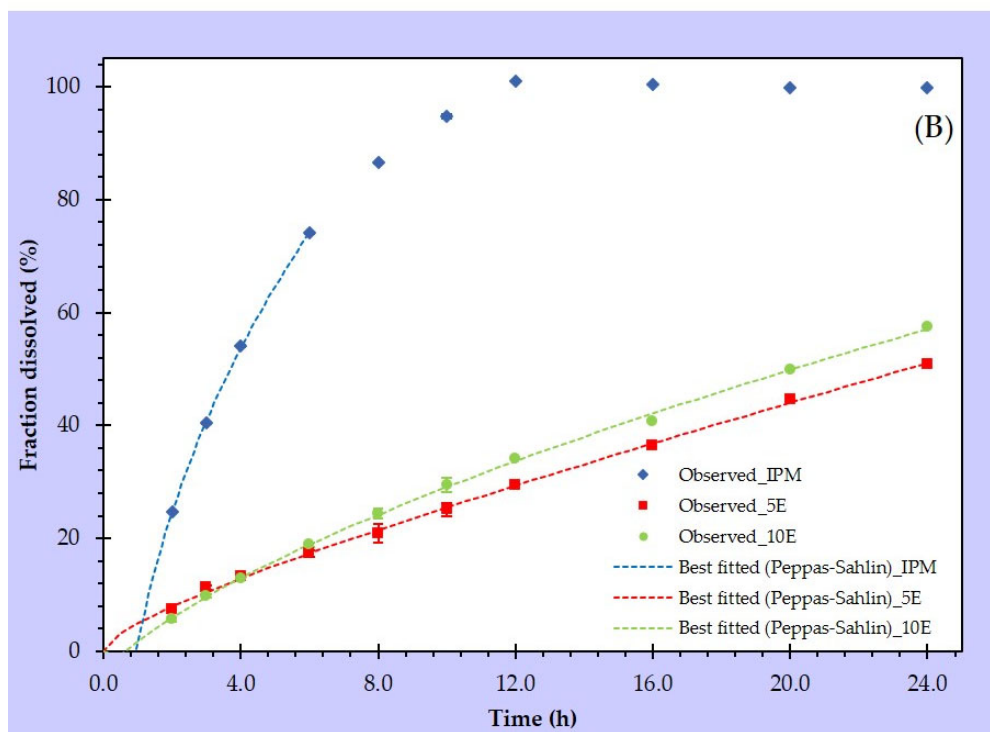

**Figure S7.** Best mathematic model fitting of drug release profiles of effervescent matrix tablets in (A) 0.1 N HCl buffer and (B) phosphate buffer pH 6.8
